# Supplementary material for: Modeling the effects of tree species and temperature on soil's extracellular enzyme activity in 78-year-old tree plantations
Source: Copernicus journal article supplement (doi:10.5194/bg-2017-144), 2017-05-31
Supplement: Supplementary file 1 [file bg-2017-144-supplement.pdf]

5

Supplementary materials

10

**Table S1.** Comparison of the performance of the fitting results between Model 1 and Model 2 using the Akaike information criterion and the Bayesian information criterion.

15

|     | <u>AIC</u> |         | <u>BIC</u> |         |
|-----|------------|---------|------------|---------|
|     | Model 1    | Model 2 | Model 1    | Model 2 |
| BG  | 83.25      | 77.73   | 106.33     | 93.12   |
| NAG | 81.50      | 76.73   | 104.58     | 92.12   |
| LAP | 12.73      | 11.57   | 10.35      | 3.82    |
| AP  | 80.45      | 74.47   | 103.53     | 89.86   |

BG,  $\beta$ -glucosidase; NAG, *N*-acetylglucosaminidase; LAP, leucine aminopeptidase; AP, acid phosphatase; AIC, Akaike information criterion; BIC, Bayesian information criterion

20

25

5

10

**Table S2.** Model parameters of Equation 5 for residual soil C contents under different tree species across time with different extracellular enzyme activities.

|               | BG          | NAG         | LAP         | AP          |
|---------------|-------------|-------------|-------------|-------------|
| $\beta_0$     | -2.19785309 | -2.39483244 | -0.55407280 | -0.50758993 |
| $\beta_1$     | 0.08273358  | 0.07592116  | 0.03148246  | 0.07480559  |
| $\beta_{2sp}$ | -0.48260712 | 0.25997095  | -0.24294259 | -0.33588831 |
| $\beta_{2hp}$ | -0.09399809 | 0.43360852  | -0.00285819 | 0.12975114  |
| $\beta_{2kp}$ | 0.08828864  | 0.33102009  | 0.12017906  | 0.11112443  |
| $\beta_3$     | 0.02919402  | 0.04245054  | 0.01179556  | 0.04770020  |

15

BG,  $\beta$ -glucosidase; NAG, *N*-acetylglucosaminidase; LAP, leucine aminopeptidase; AP, acid phosphatase

20

25

5

10

**Table S3.** Model parameters of Equation 6 for residual soil N contents under different tree species across time with different extra-cellular enzyme activities.

|               | NAG         | LAP         |
|---------------|-------------|-------------|
| $\beta_0$     | -2.39203701 | -0.56717981 |
| $\beta_1$     | 0.07592116  | 0.03148246  |
| $\beta_{2sp}$ | 0.28903302  | -0.22794473 |
| $\beta_{2hp}$ | 0.30922792  | -0.03046445 |
| $\beta_{2kp}$ | 0.17212690  | 0.08319450  |
| $\beta_3$     | 1.27357366  | 0.36988125  |

15

NAG, *N*-acetylglucosaminidase; LAP, leucine aminopeptidase

20

25

5

10

**Table S4.** Half-residence time of residual soil C contents under different tree species with different extra-cellular enzyme activities. The total soil C decomposition over time was calculated via Equation 5. We set the half-residence time under *Eucalyptus* for different enzyme activities as  $t$  and compared it with other half-residence times under coniferous tree species.

15

|                   | BG    | NAG   | LAP   | AP    |
|-------------------|-------|-------|-------|-------|
| Slash pine        | 0.94t | 0.52t | 0.61t | 1.01t |
| Hoop pine         | 0.64t | 0.44t | 0.48t | 0.63t |
| Kauri pine        | 0.53t | 0.49t | 0.42t | 0.64t |
| <i>Eucalyptus</i> | t     | t     | t     | t     |

20

BG,  $\beta$ -glucosidase; NAG, *N*-acetylglucosaminidase; LAP, leucine aminopeptidase; AP, acid phosphatase

25

30

5

10 **Table S5.** Half-residence time of residual soil N contents under different tree species with different extracellular enzyme activities. The total soil N decomposition over time was calculated via Equation 6. We set the half-residence time under *Eucalyptus* for different enzyme activities as  $t$  and compared it with other half-residence times under coniferous tree species.

15

|                   | NAG   | LAP   |
|-------------------|-------|-------|
| Slash pine        | 0.56t | 0.72t |
| Hoop pine         | 0.55t | 0.59t |
| Kauri pine        | 0.63t | 0.52t |
| <i>Eucalyptus</i> | t     | t     |

20

NAG, *N*-acetylglucosaminidase; LAP, leucine aminopeptidase

25
